# Supplementary material for: From Intimate Exams to Ritual Nicking: Interpreting Nonconsensual Medicalized Genital Procedures as Sexual Boundary Violations
Source: Springer Nature journal article supplement (doi:10.1007/s11930-023-00376-9), 2023-12-01
Supplement: MOESM4 [file 26479310]

Section 1: Please provide the current title of manuscript

Manuscript ID no.: X

Title: *From Intimate Exams to Ritual Nicking: Interpreting NonConsensual Medicalized Genital Procedures as Sexual Boundary Violations*

Section 2: Please provide the previous authorship, in the order shown on the manuscript before the changes were introduced. Please indicate the corresponding author by adding (CA) behind the name.

|                         | First name(s) | Family name                    | ORCID or SCOPUS id, if available |
|-------------------------|---------------|--------------------------------|----------------------------------|
| 1 <sup>st</sup> author  | <i>Max</i>    | <del>BOOTH</del> <i>Buckle</i> | <i>X</i>                         |
| 2 <sup>nd</sup> author  | <i>Brian</i>  | <i>EARP</i>                    | <i>0000-0001-9691-2888</i>       |
| 3 <sup>rd</sup> author  |               |                                |                                  |
| 4 <sup>th</sup> author  |               |                                |                                  |
| 5 <sup>th</sup> author  |               |                                |                                  |
| 6 <sup>th</sup> author  |               |                                |                                  |
| 7 <sup>th</sup> author  |               |                                |                                  |
| 8 <sup>th</sup> author  |               |                                |                                  |
| 9 <sup>th</sup> author  |               |                                |                                  |
| 10 <sup>th</sup> author |               |                                |                                  |

Please use an additional sheet if there are more than 10 authors.

Section 3: Please provide a justification for change. Please use this section to explain your reasons for changing the authorship of your manuscript, e.g. what necessitated the change in authorship? Please refer to the (journal) policy pages for more information about authorship. Please explain why omitted authors were not originally included and/or why authors were removed on the submitted manuscript.

Added Bruce as author given her knowledge of history + current legislative initiatives on unconsented intimate exams. Not initially included due to time constraints which were resolved.

Section 4: Proposed new authorship. Please provide your new authorship list in the order you would like it to appear on the manuscript. Please indicate the corresponding author by adding (CA) behind the name. If the Corresponding Author has changed, please indicate the reason under section 3.

|                         | First name(s) | Family name (this name will appear in full on the final publication and will be searchable in various abstract and indexing databases) | Affiliated institute                          | E-mail address        |
|-------------------------|---------------|----------------------------------------------------------------------------------------------------------------------------------------|-----------------------------------------------|-----------------------|
| 1 <sup>st</sup> author  | Max           | Buckler                                                                                                                                | independent researcher, Hong Kong             | max.buckler@gmail.com |
| 2 <sup>nd</sup> author  | Lori          | Bruce <sup>(*)</sup>                                                                                                                   | Interdisciplinary Ctr Bioethics, Yale U.      | Lori.Bruce@yale.edu   |
| 3 <sup>rd</sup> author  | Brian         | EARP                                                                                                                                   | Uehiro Centre for Practical Ethics, U. Oxford | brian.earp@gmail.com  |
| 4 <sup>th</sup> author  |               |                                                                                                                                        |                                               |                       |
| 5 <sup>th</sup> author  |               |                                                                                                                                        |                                               |                       |
| 6 <sup>th</sup> author  |               |                                                                                                                                        |                                               |                       |
| 7 <sup>th</sup> author  |               |                                                                                                                                        |                                               |                       |
| 8 <sup>th</sup> author  |               |                                                                                                                                        |                                               |                       |
| 9 <sup>th</sup> author  |               |                                                                                                                                        |                                               |                       |
| 10 <sup>th</sup> author |               |                                                                                                                                        |                                               |                       |

Please use an additional sheet if there are more than 10 authors.

<sup>(\*)</sup> ~~ORCID~~ ORCID # 0000-0001-6059-1082

Section 6: Declaration of agreement. All authors, unchanged, new and removed *must* sign this declaration.

(NB: Please print the form, (docu)-sign and return/upload a scanned copy. Please note that signatures that have been inserted as an image file are acceptable as long as it is handwritten. Typed names in the signature box are unacceptable.) \* Please delete as appropriate. Delete all of the bold if you were on the original authorship list and are remaining as an author.

|                         | First name | Family name |                                                                                                                                                                        | Signature                                                                             | Date            |
|-------------------------|------------|-------------|------------------------------------------------------------------------------------------------------------------------------------------------------------------------|---------------------------------------------------------------------------------------|-----------------|
| 1 <sup>st</sup> author  | Max        | Buckler     | I agree to the proposed new authorship shown in section 4 /and the addition/removal*of my name to the authorship list /and the proposed change in corresponding author | x  | x<br>10/6/2023  |
| 2 <sup>nd</sup> author  | Lori       | Bruce       | I agree to the proposed new authorship shown in section 4 /and the addition/removal*of my name to the authorship list /and the proposed change in corresponding author | x  | 10/4/23         |
| 3 <sup>rd</sup> author  | Brian      | EARP        | I agree to the proposed new authorship shown in section 4 /and the addition/removal*of my name to the authorship list /and the proposed change in corresponding author | x  | x<br>6 Oct 2023 |
| 4 <sup>th</sup> authors |            |             | I agree to the proposed new authorship shown in section 4 /and the addition/removal*of my name to the authorship list /and the proposed change in corresponding author |                                                                                       |                 |
| 5 <sup>th</sup> author  |            |             | I agree to the proposed new authorship shown in section 4 /and the addition/removal*of my name to the authorship list /and the proposed change in corresponding author |                                                                                       |                 |
| 6 <sup>th</sup> author  |            |             | I agree to the proposed new authorship shown in section 4 /and the addition/removal*of my name to the authorship list /and the proposed change in corresponding author |                                                                                       |                 |
| 7 <sup>th</sup> author  |            |             | I agree to the proposed new authorship shown in section 4 /and the addition/removal*of my name to the authorship list /and the proposed change in corresponding author |                                                                                       |                 |

Section 5: Author contribution, Acknowledgement and Disclosures. Please use this section to provide a new disclosure statement and, if appropriate, acknowledge any contributors who have been removed as authors and ensure you state what contribution any new authors made (if applicable per the journal or book (series) policy). **Please ensure these are updated in your manuscript - after approval of the change(s) - as our production department will not transfer the information in this form to your manuscript.**

---

New acknowledgements:

N/A

New Disclosures (financial and non-financial interests, funding):

N/A

New Author Contributions statement (if applicable per the journal policy):

N/A

---

State 'Not applicable' if there are no new authors.

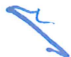

N/A

|                         | First name | Family name |                                                                                                                                                                               | Signature | Date |
|-------------------------|------------|-------------|-------------------------------------------------------------------------------------------------------------------------------------------------------------------------------|-----------|------|
| 8 <sup>th</sup> author  |            |             | I agree to the proposed new authorship shown in section 4 /and the <b>addition/removal*of my name to the authorship list</b> /and the proposed change in corresponding author |           |      |
| 9 <sup>th</sup> author  |            |             | I agree to the proposed new authorship shown in section 4 /and the <b>addition/removal*of my name to the authorship list</b> /and the proposed change in corresponding author |           |      |
| 10 <sup>th</sup> author |            |             | I agree to the proposed new authorship shown in section 4 /and the <b>addition/removal*of my name to the authorship list</b> /and the proposed change in corresponding author |           |      |

Please use an additional sheet if there are more than 10 authors.

**In case of author collaborations with formal agreement:**

N/A

|                                | Name of consortium/consortia | First name | Family name |                                                                                                                                                                               | Signature | Date |
|--------------------------------|------------------------------|------------|-------------|-------------------------------------------------------------------------------------------------------------------------------------------------------------------------------|-----------|------|
| Representative/legal guarantor |                              |            |             | I agree to the proposed new authorship shown in section 4 /and the <b>addition/removal*of my name to the authorship list</b> /and the proposed change in corresponding author |           |      |

Both added/removed authors should complete the information in the first table under Section 6.

---- End of form ----
